# Supplementary material for: Phylogenetic and Spatiotemporal Analyses of Porcine Epidemic Diarrhea Virus in Guangxi, China during 2017–2022
Source: MDPI journal article supplement (doi:10.3390/ani13071215), 2023-03-31
Supplement: s1 [file s1]

**Supplementary Table S1.** Information regarding the determined strains in Guangxi during 2017-2022 and the reference strains of PEDV.

| Virus strain | Collection date | City of origin | Accession number | Virus strain    | Collection date | Country of origin | Accession number |
|--------------|-----------------|----------------|------------------|-----------------|-----------------|-------------------|------------------|
| 17-GXCZ-1    | 2017            | Chongzuo       | MK000562         | CV777           | 2001            | Belgium           | AF353511.1       |
| 17-GXCZ-2    | 2017            | Chongzuo       | MK000564         | JS-2004-2       | 2004            | China             | AY653204.1       |
| 17-GXGG-1    | 2017            | Guigang        | MK000570         | LZC             | 2006            | China             | EF185992.1       |
| 17-GXGG-2    | 2017            | Guigang        | MK000574         | virulent DR13   | 2009            | South Korea       | JQ023161.1       |
| 17-GXGG-3    | 2017            | Guigang        | MK000575         | SM98            | 2010            | South Korea       | GU937797.1       |
| 17-GXGG-4    | 2017            | Guigang        | MK000576         | CH/S            | 2011            | China             | JN547228.1       |
| 17-GXGG-5    | 2017            | Guigang        | MK000577         | LC              | 2011            | China             | JX489155.1       |
| 17-GXGG-6    | 2017            | Guigang        | MK000582         | SC-L            | 2011            | China             | KC886306.2       |
| 17-GXNN-1    | 2017            | Nanning        | MK000578         | PEDV-7C         | 2011            | China             | KM609204.1       |
| 17-GXNN-2    | 2017            | Nanning        | MK000563         | CH-GDHY-2011    | 2011            | China             | JX145339.1       |
| 17-GXQZ-1    | 2017            | Qinzhou        | MH985745         | AJ1102          | 2011            | China             | JX188454.1       |
| 17-GXQZ-2    | 2017            | Qinzhou        | MK000566         | attenuated DR13 | 2011            | South Korea       | JQ023162.1       |
| 17-GXQZ-3    | 2017            | Qinzhou        | MK000569         | CHGD-01         | 2011            | China             | JN980698.1       |
| 18-GXBH-1    | 2018            | Beihai         | MK000572         | CH/ZMDZY/11     | 2011            | China             | KC196276.1       |
| 18-GXBH-2    | 2018            | Beihai         | MK000573         | AH-M            | 2011            | China             | KJ158152.1       |
| 18-GXBH-3    | 2018            | Beihai         | MK478139         | CH/GDGZ/2012    | 2012            | China             | KF384500.1       |
| 18-GXBH-4    | 2018            | Beihai         | MK478140         | GD-A            | 2012            | China             | JX112709.1       |
| 18-GXBH-5    | 2018            | Beihai         | MK478146         | GDS01           | 2012            | China             | KM089829.1       |
| 18-GXBH-6    | 2018            | Beihai         | MK478147         | OKN-1/JPN/2013  | 2013            | Japan             | LC063836.1       |
| 18-GXBH-7    | 2018            | Beihai         | MK478148         | MEX/104/2013    | 2013            | Mexico            | KJ645708.1       |

|           |      |          |          |                        |      |             |            |
|-----------|------|----------|----------|------------------------|------|-------------|------------|
| 18-GXCZ-1 | 2018 | Chongzuo | MK000571 | KGS-1/JPN/2013         | 2013 | Japan       | LC063814.1 |
| 18-GXGG-1 | 2018 | Guigang  | MK000579 | IBR-1/JPN/2013         | 2013 | Japan       | LC063820.1 |
| 18-GXGG-2 | 2018 | Guigang  | MK000580 | CH/YNKM-8/2013         | 2013 | China       | KF761675.1 |
| 18-GXGG-3 | 2018 | Guigang  | MK000583 | CHM2013                | 2013 | China       | KM887144.1 |
| 18-GXGG-4 | 2018 | Guigang  | MK478145 | CHYJ130330             | 2013 | China       | KJ020932.1 |
| 18-GXGG-5 | 2018 | Guigang  | MK478150 | FJ-YX 2013             | 2013 | China       | KJ646590.1 |
| 18-GXGG-6 | 2018 | Guigang  | MK478153 | FL2013                 | 2013 | China       | KP765609.1 |
| 18-GXGG-7 | 2018 | Guigang  | MK478154 | GDEP/2013              | 2013 | China       | KF601200.1 |
| 18-GXLB-1 | 2018 | Laibin   | MK478152 | PC21A                  | 2013 | USA         | KR078299.1 |
| 18-GXLZ-1 | 2018 | Liuzhou  | MK478138 | PEDV-CHZ               | 2013 | China       | KM609209.1 |
| 18-GXNN-1 | 2018 | Nanning  | MK478136 | USA/Colorado/2013      | 2013 | USA         | KF272920.1 |
| 18-GXNN-2 | 2018 | Nanning  | MK478137 | USA/Indiana/17846/2013 | 2013 | USA         | KF452323.1 |
| 18-GXNN-3 | 2018 | Nanning  | MK478141 | USA/Iowa106/2013       | 2013 | USA         | KJ645695.1 |
| 18-GXNN-4 | 2018 | Nanning  | MK478142 | USA/Ohio60/2013        | 2013 | USA         | KJ645657.1 |
| 18-GXNN-5 | 2018 | Nanning  | MK478149 | USA/Oklahoma35/2013    | 2013 | USA         | KJ645642.1 |
| 18-GXNN-6 | 2018 | Nanning  | MK478151 | XY2013                 | 2013 | China       | KR818832.1 |
| 18-GXNN-7 | 2018 | Nanning  | MK478155 | YN15                   | 2013 | China       | KT021228.1 |
| 18-GXQZ-1 | 2018 | Qinzhou  | MK478135 | ZJU/G2/2013            | 2013 | China       | KU558701.1 |
| 18-GXQZ-2 | 2018 | Qinzhou  | MK478143 | ON-018                 | 2014 | Canada      | KM189367.1 |
| 18-GXQZ-3 | 2018 | Qinzhou  | MK478144 | OH851                  | 2014 | USA         | KJ399978.1 |
| 18-GXQZ-4 | 2018 | Qinzhou  | MN019125 | NL/GD002/2014          | 2014 | Netherlands | KR011122.1 |
| 18-GXQZ-5 | 2018 | Qinzhou  | MK000567 | L00721/GER/2014        | 2014 | Germany     | LM645057.1 |
| 18-GXQZ-6 | 2018 | Qinzhou  | MK000568 | KNU-141112-feces       | 2014 | South Korea | KR873431.1 |
| 18-GXYL-1 | 2018 | YuLin    | MK000581 | EAS1                   | 2014 | Thailand    | KR610991.1 |

|           |      |         |          |                         |      |          |            |
|-----------|------|---------|----------|-------------------------|------|----------|------------|
| 18-GXYL-2 | 2018 | YuLin   | MK000584 | FJ-FQ 2014              | 2014 | China    | KJ646580.1 |
| 18-GXYL-3 | 2018 | YuLin   | MK000565 | CHSD2014                | 2014 | China    | KX791060.1 |
| 19-GXBH-1 | 2019 | Beihai  | MW114971 | CH-SDDP-3-2014          | 2014 | China    | KU133238.1 |
| 19-GXBH-2 | 2019 | Beihai  | MW114972 | CH-SHC-12-2014          | 2014 | China    | KR296673.1 |
| 19-GXBH-3 | 2019 | Beihai  | MW703493 | FR/001/2014             | 2014 | France   | KR011756.1 |
| 19-GXQZ-1 | 2019 | Qinzhou | MN019126 | COL/Cundinamarca/2014   | 2014 | Colombia | KU569509.1 |
|           |      |         |          | 4                       |      |          |            |
| 20-GXBH-1 | 2020 | Beihai  | MW114973 | GER/L00719/2014         | 2014 | Germany  | LM645058.1 |
| 20-GXNN-1 | 2020 | Nanning | MW703496 | PEDV-WS                 | 2014 | China    | KM609213.1 |
| 20-GXNN-2 | 2020 | Nanning | MW703495 | CAN/Quebec334/2014      | 2014 | Canada   | KR265831.1 |
| 20-GXNN-3 | 2020 | Nanning | MW703497 | PEDV-LYG                | 2014 | China    | KM609212.1 |
| 20-GXNN-4 | 2020 | Nanning | MW703498 | SK-030                  | 2014 | Canada   | KM196109.1 |
| 20-GXNN-5 | 2020 | Nanning | OP390411 | Tottori2/JPN/2014       | 2014 | Japan    | LC022792.1 |
| 20-GXNN-6 | 2020 | Nanning | OP390412 | TTR-1/JPN/2014          | 2014 | Japan    | LC063822.1 |
| 20-GXGG-1 | 2020 | Guigang | OP390410 | TTR-2/JPN/2014          | 2014 | Japan    | LC063828.1 |
| 20-GXWZ-1 | 2020 | Wuzhou  | MW703494 | TW-Chiayi-32            | 2014 | China    | KP276246.1 |
| 20-GXQZ-1 | 2020 | Qinzhou | OP390413 | Ukraine/Poltava01/2014  | 2014 | Ukraine  | KP403954.1 |
| 20-GXYL-1 | 2020 | YuLin   | OP390414 | USA/SouthDakota285/2014 | 2014 | USA      | KR265787.1 |
|           |      |         |          | 014                     |      |          |            |
| 21-GXBH-1 | 2021 | Beihai  | OP390415 | USA/SouthDakota336/2014 | 2014 | USA      | KR265811.1 |
|           |      |         |          | 014                     |      |          |            |
| 21-GXBH-2 | 2021 | Beihai  | OP390416 | YC2014                  | 2014 | China    | KT428879.1 |
| 21-GXBH-3 | 2021 | Beihai  | OP390417 | ZK-O                    | 2014 | Japan    | LC053343.1 |
| 21-GXBH-4 | 2021 | Beihai  | OP390418 | CH/GDZH02/1401          | 2014 | China    | KR153325.1 |

|           |      |         |          |                  |      |          |            |
|-----------|------|---------|----------|------------------|------|----------|------------|
| 21-GXGG-1 | 2021 | Guigang | OP390431 | CH/GDZHDM/1401   | 2014 | China    | KX016034.1 |
| 21-GXGG-2 | 2021 | Guigang | OP390438 | 15V010/BEL/2015  | 2015 | Belgium  | KR003452.1 |
| 21-GXGG-3 | 2021 | Guigang | OP390439 | 25-10_2015_AUT   | 2015 | Austria  | KT206204.1 |
| 21-GXGG-4 | 2021 | Guigang | OP390443 | CH/GX/2015/750A  | 2015 | China    | KY793536.1 |
| 21-GXLB-1 | 2021 | Laibin  | OP390440 | AVCT12           | 2015 | Thailand | LC053455.1 |
| 21-GXLB-2 | 2021 | Laibin  | OP390441 | CH/HNYF/14       | 2015 | China    | KP890336.1 |
| 21-GXLB-3 | 2021 | Laibin  | OP390444 | CH/JXJJ06/2015   | 2015 | China    | MG742381.1 |
| 21-GXLZ-1 | 2021 | Liuzhou | OP390423 | CH-GLC-02-2015   | 2015 | China    | KR296664.1 |
| 21-GXLZ-2 | 2021 | Liuzhou | OP390424 | CH-HGC-01-2015   | 2015 | China    | KR296667.1 |
| 21-GXLZ-3 | 2021 | Liuzhou | OP390425 | HNAY             | 2015 | China    | KR809885.1 |
| 21-GXLZ-4 | 2021 | Liuzhou | OP390430 | JSL5-1/2015      | 2015 | China    | KX534205.1 |
| 21-GXLZ-5 | 2021 | Liuzhou | OP390432 | ZL29             | 2015 | China    | KU847996.1 |
| 21-GXLZ-6 | 2021 | Liuzhou | OP390433 | CH/HN7/2016      | 2015 | China    | MF152597.1 |
| 21-GXLZ-7 | 2021 | Liuzhou | OP390434 | CH/HNQX-3/14     | 2015 | China    | KR095279.1 |
| 21-GXLZ-8 | 2021 | Liuzhou | OP390447 | PEDV-SX          | 2015 | China    | KY420075.1 |
| 21-GXLZ-9 | 2021 | Liuzhou | OP390448 | PT-P5            | 2015 | China    | KY929405.1 |
| 21-GXNN-1 | 2021 | Nanning | OP390419 | CH/SXYL/2016     | 2016 | China    | MF462814.1 |
| 21-GXNN-2 | 2021 | Nanning | OP390426 | CH-AHHX-1-2016   | 2016 | China    | MG020539.1 |
| 21-GXNN-3 | 2021 | Nanning | OP390428 | CH-ML-1-2016     | 2016 | China    | MG020551.1 |
| 21-GXNN-4 | 2021 | Nanning | OP390435 | HBHG6            | 2016 | China    | KY775049.1 |
| 21-GXNN-5 | 2021 | Nanning | OP390436 | HBJZ2            | 2016 | China    | KY775039.1 |
| 21-GXNN-6 | 2021 | Nanning | OP390437 | JLDH             | 2016 | China    | MF346935.1 |
| 21-GXNN-7 | 2021 | Nanning | OP390442 | JSCZ1601         | 2016 | China    | KY070587.1 |
| 21-GXNN-8 | 2021 | Nanning | OP390453 | PED-JS-2016-05-3 | 2016 | China    | MF038010.1 |

|           |      |         |          |                      |      |          |            |
|-----------|------|---------|----------|----------------------|------|----------|------------|
| 21-GXQZ-1 | 2021 | Qinzhou | OP390445 | TG5                  | 2016 | Viet Nam | MG373533.1 |
| 21-GXWZ-1 | 2021 | Wuzhou  | OP390420 | PDS2S                | 2016 | China    | KY211053.1 |
| 21-GXWZ-2 | 2021 | Wuzhou  | OP390421 | 17GXCZ-1ORF3c        | 2017 | China    | MT547180.1 |
| 21-GXWZ-3 | 2021 | Wuzhou  | OP390422 | 17GXCZ-1ORF3d        | 2017 | China    | MT547179.1 |
| 21-GXWZ-4 | 2021 | Wuzhou  | OP390429 | CH/SCAZ10/2017       | 2017 | China    | MH061339.1 |
| 22-GXNN-1 | 2022 | Nanning | OP390449 | GDS52                | 2017 | China    | MH726407.1 |
| 22-GXNN-2 | 2022 | Nanning | OP390450 | PC22A                | 2017 | USA      | KY499262.1 |
| 22-GXWZ-1 | 2022 | Wuzhou  | OP390451 | PC273/D194           | 2017 | USA      | MH000205.1 |
| 22-GXWZ-2 | 2022 | Wuzhou  | OP390452 | CH/HBXT/2018         | 2018 | China    | MH816969.1 |
|           |      |         |          | GXGG05               | 2018 | China    | MK731917.1 |
|           |      |         |          | GXBH02               | 2018 | China    | MK731908.1 |
|           |      |         |          | GDhy17               | 2019 | China    | MN368699.1 |
|           |      |         |          | CH/GX/2015/750A      | 2015 | China    | KY793536.1 |
|           |      |         |          | CH/GX/PEDV/1401/2016 | 2016 | China    | MZ364310.1 |
|           |      |         |          | CH/GX/PEDV/1008/2016 | 2016 | China    | MZ364309.1 |
|           |      |         |          | CH/GX/PEDV/997/2016  | 2016 | China    | MZ364308.1 |
|           |      |         |          | CH/GX/PEDV/938/2016  | 2016 | China    | MZ364307.1 |
|           |      |         |          | CH/GX/PEDV/1902/2017 | 2017 | China    | MZ364311.1 |
|           |      |         |          | CH/GX/PEDV/2373/2018 | 2018 | China    | MZ364314.1 |
|           |      |         |          | CH/GX/PEDV/1984/2018 | 2018 | China    | MZ364313.1 |
|           |      |         |          | CH/GX/PEDV/1939/2018 | 2018 | China    | MZ364312.1 |
|           |      |         |          | GX/HZ/CH/2018/Jan    | 2018 | China    | MK135453.1 |
|           |      |         |          | CH/GX/PEDV/2473/2019 | 2019 | China    | MZ364316.1 |
|           |      |         |          | CH/GX/PEDV/2467/2019 | 2019 | China    | MZ364315.1 |

---
